# Supplementary material
Source: Springer Nature journal article supplement (https://www.springermedizin.de/resource/supplementary/13054_2011_502_MOESM2_ESM.pdf/9708526)

# Patients given crystalloids, HES 130/0.4 or both

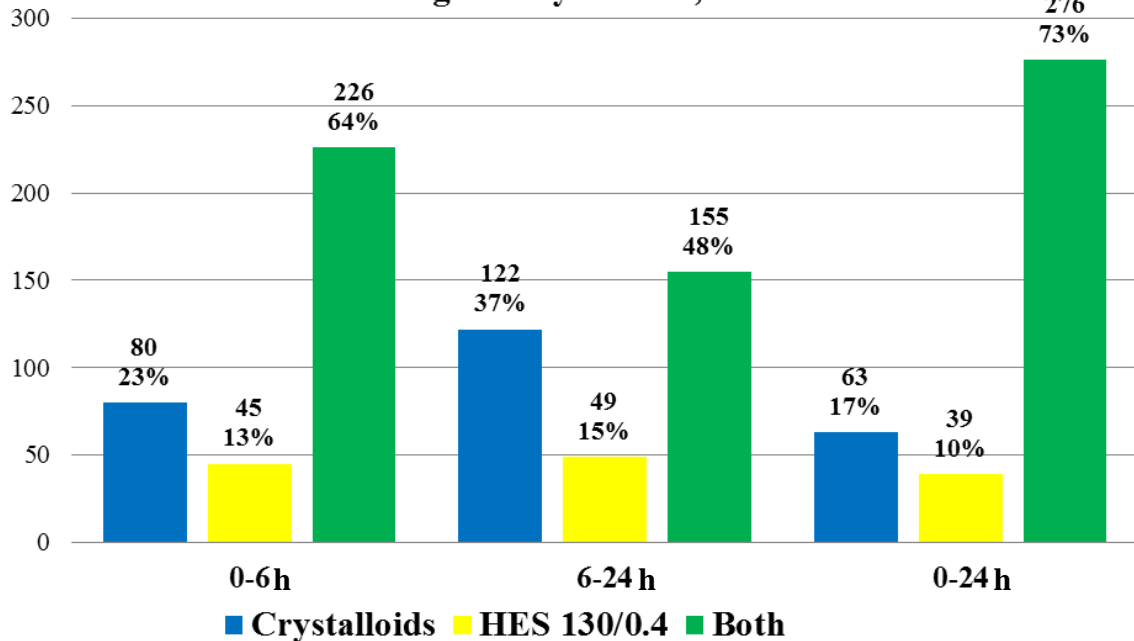

Supplement: MOESM2 [file 9708526]
